# Supplementary material
Source: MDPI journal article supplement (https://www.mdpi.com/2673-1592/6/1/15)
Supplement: s1 [file s1]

Archive with 1 entries (1 files):
- prosthesis-2779791-supplementary.pdf
